# Supplementary material
Source: HighWire-hosted journal article supplement (https://bmjopen.bmj.com/content/8/2/e018791)
Supplement: inline-supplementary-material-3 [file inline-supplementary-material-3.pdf]

**Appendix 2:** Excluded papers (n = 14)

| Publications             | Reasons for exclusion |   |   |   |   |   |   |
|--------------------------|-----------------------|---|---|---|---|---|---|
|                          | 1                     | 2 | 3 | 4 | 5 | 6 | 7 |
| AANN[1]                  | ✓                     |   |   |   |   |   |   |
| AANN[2]                  | ✓                     |   |   |   |   |   |   |
| AANN[3]                  | ✓                     |   |   |   |   |   |   |
| Annick, et al.[4]        |                       | ✓ | ✓ |   |   |   |   |
| Carney, et al.[5]        | ✓                     |   |   |   |   |   |   |
| Ehlhardt, et al.[6]      |                       |   |   | ✓ |   |   |   |
| NICE.[7]                 |                       |   |   |   | ✓ |   |   |
| Seel, et al[8]           |                       |   |   | ✓ |   | ✓ |   |
| Sohlberg, et al[9]       |                       |   |   | ✓ |   |   |   |
| Stergiou-Kita, et al[10] |                       | ✓ |   | ✓ |   |   |   |
| Taricco, et al[11]       |                       |   |   |   |   | ✓ |   |
| WLDI[12]                 | ✓                     |   |   |   | ✓ |   |   |
| CDWC[13]                 |                       |   |   |   |   |   | ✓ |
| IHF[14]                  |                       |   |   |   |   |   | ✓ |

1 = Does not refer to an inpatient rehabilitation and / or community rehabilitation setting

2 = Guideline is not officially sponsored or supported by a health professional association or society, public or private organization, health care organization or plan, or government agency.

3 = No recommendation statements provided

4 = Guideline focuses exclusively on a single component of rehabilitation

5 = Incorrect patient population

6 = Does not meet definition of a clinical practice guideline

7 =Guideline is not based on a systematic literature search

AANN = American Association of Neuroscience Nurses, NICE = National Institute for Health and Clinical Excellence, WLDI = Work Loss Data Institute, CDWC= , IHF= Irish Heart Foundation

### **References papers excluded after evaluation of full text:**

1. American Association of Neuroscience Nurses (AANN). Nursing management of adults with severe traumatic brain injury. Available: <http://www.aann.org/pdf/cpg/aanntraumaticbraininjury.pdf>. 2008. Accessed November 7, 2016.
2. American Association of Neuroscience Nurses (AANN). Care of the patient with aneurysmal subarachnoid haemorrhage. Available: <http://www.aann.org/pdf/cpg/aannaneurysmalsah.pdf>. 2009. Accessed November 7, 2016.
3. American Association of Neuroscience Nurses (AANN). Guide to the care of the hospitalized patient with ischaemic stroke. Illinois: AANN. 2008.
4. Annick AA, Timmermans AAA, Seelen HAM, Willmann RD, Kingma H. Technology-assisted training of arm-hand skills in stroke: concepts on reacquisition of motor control and therapist guidelines for rehabilitation technology design. Journal of NeuroEngineering and Rehabilitation. Available:<http://jneuroengrehab.biomedcentral.com/articles/10.1186/1743-0003-6-1>. 2009. Accessed November 7, 2016.
5. Carney, N., Totten, A., O'Reilly., Ullman, J., Hawryluk, G., Bell, M. et al. (2016). Guidelines for the management of severe traumatic brain injury, 4<sup>th</sup> ed. America: Brain Trauma Foundation. Available from [https://braintrauma.org/uploads/03/12/Guidelines\\_for\\_Management\\_of\\_Severe\\_TBI\\_4th\\_Edition.pdf](https://braintrauma.org/uploads/03/12/Guidelines_for_Management_of_Severe_TBI_4th_Edition.pdf). Accessed November 11, 2017.
6. Ehlhardt L, Sohlberg M, Kennedy M, Coelho C, Ylvisaker M, Turkstra L, et al. Evidence-based practice guidelines for instructing individuals with neurogenic memory impairments: What have we learned in the past 20 years? Neuropsychological Rehabilitation, 2008;18:3, 300-342.
7. National Institute for Health and Clinical Excellence (NICE). Rehabilitation after critical illness. London: NICE. Available: <https://www.nice.org.uk/guidance/cg83/evidence/full-guideline-242292349>. 2009. Accessed November 7, 2016.
8. Seel RT, Sherer M, Whyte J, Katz DI, Giacino JT, Rosenbaum AM, et al. (2010). Assessment scales for disorders of consciousness: evidence-based recommendations for

clinical practice and research. *Archives of Physical Medicine and Rehabilitation*, 2010. 91(12):1795-813.

9. Sohlberg MM, Kennedy MRT, Avery J, Coelho C, Turkstra L, Ylvisaker M, et al. Evidence based practice for the use of external aids as a memory rehabilitation technique. *Journal of Medical Speech Pathology*, 2007; 15(1): xv-li.
10. Stergiou-Kita M, Dawson D, Rappolt S. Inter-Professional Clinical Practice Guideline for Vocational Evaluation Following Traumatic Brain Injury: A Systematic and Evidence-Based Approach. *Journal of Occupational Rehabilitation*, 2010; 22: 166–181.
11. Taricco M, Liberati A. Rehabilitation of traumatic brain injury. Current guidelines and beyond. *Europa Medicophysica*, 2006; 42(1), p69-71.
12. Work Loss Data Institute. Head (trauma, headaches, etc., not including stress & mental disorders). Available: <http://f.i-md.com/medinfo/material/06e/4eb0180744aee4f554e1706e/4eb0182b44aee4f554e17071.pdf>. 2013. Accessed November 7, 2016.
13. Colorado Division of Workers' Compensation. Traumatic brain injury medical treatment guidelines. Denver (CO): Colorado Division of Workers Compensation. Available from URL: <http://www.healthpsych.com/tools/tbi.pdf>. 2012. Accessed November 7, 2016.
14. Irish Heart Foundation. National clinical guidelines and recommendations for the care of people with stroke and transient ischaemic attack. Dublin: Irish Heart Foundation. Available from <http://www.stroke.ie/media/pub/strokeie/Strokeguidelinesfinal.pdf>. 2010. Accessed November 7, 2016
